# Supplementary material
Source: PubMed Central journal article supplement (PMC1255985)
Supplement: plntphys_pp.105.064238_1.pdf [file plntphys_pp.105.064238_1.pdf]

**Supplementary Figure 1** Multiple sequence alignment of LAR and IFR proteins as well as distantly related ANR and DFR proteins of the Reductase-Epimerase-Dehydratase superfamily that is the basis of the phylogenetic tree of Figure 2. The alignment was formed by the ClustalW program using the default parameters of the MEGA program (Kumar et al., 2004). Residues highlighted in black and gray are conserved in all proteins in the alignment. The residues highlighted in yellow are the RFLP, ICCN and THD motifs conserved in the LAR sequences but not conserved in the related IFR subfamily and more distant RED homologues. The alignment includes all related proteins from the Arabidopsis genome (designated according to their AGI number) to give an indication of how the proteins from other species fit into a complete genome. Also included are enzymes for which a catalytic function has been shown such as IFR, PLR, PCBER in the IFR sub-family, Arabidopsis and Medicago ANR and Arabidopsis and maize DFR. The IFR sub-family includes six grape IFR-like (IFRL) proteins found in the grape EST collections (IFRL\_Vitvi1-6, BN000706-11). The ANR/DFR group shows only a small fraction of the proteins in this branch of the RED superfamily. The Arabidopsis proteins most closely related to ANR (At4g27250) and DFR (At2g45400) are also included. The proteins are labeled according to their proposed catalytic activity followed by the species they come from, e.g. LAR\_Desun is LAR from *Desmodium uncinatum* (Q84V83). Other species represented in the phylogenetic tree and database accession numbers are *Cicer arietinum* (IFR, Q00016), *Forsythia x intermedia* (PLR, AAC49608; PCBER, AAF64174), *Gossypium arboretum* (ANR CAD91910; LAR1, BN000695; LAR2, BN000699), *Gossypium raimondii* (LAR1, BN000700; LAR2, BN000701), *Hordeum vulgare* (LAR, BN000696), *Medicago truncatula* (ANR, AAN77735; LAR, BN000703), *Oryza sativa* (LAR, BN000704), *Phaseolus coccineus* (ANR, CAD91909; LAR, BN000698), *Pinus taeda* (LAR, BN000697), *Vitis shuttleworthii* (LAR1, BN000702), *Vitis vinifera* (ANR, CAD91911; DFR, P51110; LAR1, AJ865336; LAR2, AJ865334), and *Zea mays* (DFR, CAA28734).

```

*          20          *          40          *          60          *
LAR Orysa : -----MAPAAQELLQLQEVPPRRRTGAALIVGATGYIGRFVAE : 37
LAR Desun : -----MTVS--GAIPSMTKNRTLIVGGTGFIGQFITK : 30
LAR1_Pinta : MACATDVARQFLPCVQVPVSSMGGETARSINLTCNGLSPPQPOYNAENHDDTTVATRVLIIGATGFIGRFVAE : 75
LAR1_Vitvi : -----MTVSPVPSPKGRVLIAGATGFIGQFVAT : 28
LAR2_Vitvi : -----MTVLSVSTPPAPQAPPAATGPRTLIVVGASGFIGRFVAE : 38
LAR1_Vitsh : -----MTVSPVPSLKGRVLIAGATGFIGQFVAA : 28
LAR Horvu : -----MAPC--EELQEEVA---RSGPALIVGATGYIGRFVAE : 32
LAR_Medtr : -----MAPSSPPTP-ISKGRVLIIVGATGFIMGKFVTE : 31
LAR_Phaco : -----MVTs--PTIPSHTKARVLIIGATGFIGKFVTE : 30
LAR2_Gosar : -----MKSTQMNGSYPNESEAGQTVVIGSSGFIGRFITE : 34
LAR2_Gosra : -----MKSTHMNGSYPNESETGQTLVIIGSSGFIGRFITE : 34
LAR1_Gosar : -----MTVS---VANGRVLIIVGATGFIGRFVAD : 25
LAR1_Gosra : -----MTVS---VANGRVLIIVGATGFIGRFVAD : 25
IFRL1_Vitv : -----MEKSKVLIVGGTGYIGRRMVE : 21
IFRL2_Vitv : -----QQSSGKAMESVLSIILIFGGTGYIGRYMVK : 30
IFRL3_Vitv : -----MVCEKSKILVFGATGYLGKYMVK : 23
IFRL4_Vitv : -----MAEKSKILIIIGGTGYIGKFVQ : 22
IFRL5_Vitv : -----MSEKSKILIIIGGTGYIGKFIVA : 22
IFRL6_Vitv : -----MSDKSKILIIIGGTGYIGKFIVA : 22
At1g19540 : -----MTSKILVIGATGLIGKVLVE : 20
At1g32100 : -----MGESKRTEKTRVLIVGATGYIGKRIVR : 27
At1g75280 : -----MATEKSKILVIGGTGYIGKFLVE : 23
At1g75290 : -----MASEKSKILVIGGTGHIGKLIIE : 23
At1g75300 : -----MTTEKSKILVIGGTGYMGFEFIVE : 23
At4g13660 : -----MKETNFGEKTRVLIVGGTGSGLGRRIVS : 27
At4g34540 : -----MEEKSKSRVLIIGATGRLGNYLTR : 25
At4g39230 : -----MTSKSKILFIIIGGTGYIGKYIVE : 22
PLR_Forin : -----MGKSKVLIIIGGTGYLGRRLVK : 21
PCBER_Fori : -----MAEKTKILIIIGGTGYIGKFVAE : 22
IFR_Cicar : -----MASQNRILVIGPTGAIGRHVW : 22
DFR_At5g42 : -----MVSQKETVCVTGASGFISWLVM : 23
At2g45400 : -----MVREEQEEDNNNNNNGGGERKLLVADETVPSLLDETVGLVCGVTGGSGFVASWLIM : 55
DFR_Vitvi : -----MGSQSETVCVTGASGFISWLVM : 23
DFR_MAIZE : -----MERGAGASEKGTVLVTGASGFVGSWLVM : 28
At4g27250 : -----MELQGEESKTATYCVTASGYIGSWLVK : 28
ANR_Medtr : -----MASIKQIEIEKKKACVIGGTGFVASLLIK : 29
ANR_Arath : -----MDQTLTHTG--SKKACVIGGTGNLASILIK : 28
ANR_Phaco : -----MATVKKIG---KKACVIGGSGFMASCLVK : 26
ANR_Gosar : -----MASQL-VG--TKRACVGGSGFVASLLVK : 26
ANR_Vitvi : -----MATQHPIG--KKTACVGGTGFVASLLVK : 27

```

|            | 80                                  | *     | 100     | *   | 120                | *                           | 140           | *              |
|------------|-------------------------------------|-------|---------|-----|--------------------|-----------------------------|---------------|----------------|
| LAR Orysa  | : ACLDSGRDTFILVRPG                  | ----- | NACP    | --  | ARAASVDALRQKGAVV   | IEGCVGGKEGRKSVEAALRARG      | VEVVI         | : 100          |
| LAR_Desun  | : ASLFGGYPTFLLVRPG                  | ----- | PVSP    | --  | SKAVIIKTFQDKGAKVI  | IYGVINDKE                   | ---CMEKILKEYE | IDVVI : 90     |
| LAR1_Pinta | : ASVKSGRPTYALVRPT                  | ----- | TLSS    | --- | KPKVIQSLVDSGIQV    | VYGLHDHN                    | ---SLVKAIR    | --QVDVVI : 132 |
| LAR1_Vitvi | : ASLDAHRPTYILARPG                  | ----- | PRSP    | --  | SKAKIFKALEDKGAI    | IYVYGLINEQE                 | ---AMEKILKEHE | IDIVV : 88     |
| LAR2_Vitvi | : ASLSPGHPTYVLRSS                   | ----- | ATTSS   | --  | SKASTIKSLEDQGA     | IVTGSIGDKE                  | ---VMIEILRKYE | IEVVI : 99     |
| LAR1_Vitsh | : ASLDAHRPTYILARPG                  | ----- | PRSP    | --  | SKAKIIKAHEDKGAI    | IYVYGLINEQE                 | ---SMEKILKEHE | IDIVV : 88     |
| LAR_Horvu  | : ACLDSGRRTFILVRPG                  | ----- | NACP    | --  | ARAASVDALLRKGAFV   | VEGRVDGKDGKRSVETALRAHG      | IEVVI : 95    |                |
| LAR_Medtr  | : ASISTAHTPTYLIRPG                  | ----- | PLIS    | --  | SKAATIKTFQEKGA     | IVYGVVNKE                   | ---FVEMILKKYE | IDTVI : 91     |
| LAR_Phaco  | : ASLLTAHTPTYLRLPP                  | ----- | PLVP    | --  | SKDAIVKTFQEKGA     | IVHGVINNKE                  | ---FVEKILKEHE | IDIVI : 90     |
| LAR2_Gosar | : ACLDSGRPTYILVRSS                  | ----- | SN-SP   | --  | SKASTIKFLQDKGA     | IVYGSITDQE                  | ---FMEKVLREYK | IEVVI : 94     |
| LAR2_Gosra | : ACLDSGRPTYILVRSS                  | ----- | SN-SP   | --  | SKASTIKFLQDKGA     | IVYGSITDQE                  | ---FMEKVLREYK | IEVVI : 94     |
| LAR1_Gosar | : ASLDAGRPTYVLRPS                   | ----- | SGNQY   | --  | SKDKVAKALQDRGA     | IVLNGLANDKE                 | ---LMVKLLKEHQ | IEIVI : 86     |
| LAR1_Gosra | : ASLDAGRPTYVLRPS                   | ----- | SGNQY   | --  | SKDKVAKALRDRGA     | IVLNGLANDKE                 | ---LMVKLLKEHQ | IEIVI : 86     |
| IFRL1_Vitv | : ASLAQGHPTFVLQRPE                  | ----- | IGMDIE  | --- | KLQMLLSFKKLGAT     | IVVEGSFADHK                 | ---SLVEAVKKV  | VDVVI : 80     |
| IFRL2_Vitv | : ASVKMGHPTYVYSRPM                  | ----- | TPQTHPS | --- | KIPELLKEFQSMGVN    | IVQOGELDEHEK                | ---LVSVIQQV   | VDVVI : 90     |
| IFRL3_Vitv | : ASVSMGHPTYAYVRPA                  | ----- | NPDAKPS | --- | KLPQHRELES         | IVGVTIFQOGELDEHET           | ---MVAALKQV   | VDVVI : 83     |
| IFRL4_Vitv | : ASAKSGHPTFALVRES                  | ----- | TIADPV  | --- | KGKLIQEFKNSGVT     | IVLHGDLYDHD                 | ---SLVKAIKQV  | VDVVI : 81     |
| IFRL5_Vitv | : ASAKSGHPTFALVRES                  | ----- | TVS     | --  | EKFEEIESFKSSGVT    | IVYGDLYDHE                  | ---SLVKAIKQV  | VDVVI : 79     |
| IFRL6_Vitv | : ASARLGHPTFALIRES                  | ----- | TVSNPS  | --- | KSGIIESFKSSGVS     | IVYGDLYDHE                  | ---SLVKAIKQV  | VDVVI : 81     |
| At1g19540  | : ESAKSGHATFALVREA                  | ----- | SLSDPV  | --- | KQQLVERFKDLGVT     | IVLYGSLSDKE                 | ---SLVKAIKQV  | VDVVI : 79     |
| At1g32100  | : ACLAEGHETYVLRPE                   | ----- | IGLEIE  | --- | KVQLFLSFKKLGAT     | IVVEGSFSDHQ                 | ---SLVSAVKLV  | VDVVV : 86     |
| At1g75280  | : ASAKAGHSTFALVREA                  | ----- | TLSDPV  | --- | KGKTVQSFKDLGVT     | IVLHGDLDNDHE                | ---SLVKAIKQV  | VDVVI : 82     |
| At1g75290  | : ASVKAGHSTLALVREA                  | ----- | SLSDPN  | --- | KGKTVQNFKDFGVT     | IVLHGDLDNDHE                | ---SLVKAIKQV  | ADVVI : 82     |
| At1g75300  | : GSAKAGNPTFALVREA                  | ----- | SLSDPV  | --- | KSKTIQSFKDLGVT     | IVLHGDLDNDHE                | ---SLVKAIKQV  | VDVVI : 82     |
| At4g13660  | : ACLAEGHETYVLRPE                   | ----- | IGVDIE  | --- | KVQLLLSFKRLGAH     | IVVEGSFSDHQ                 | ---SLVSAVKQV  | VDVVV : 86     |
| At4g34540  | : FSIESGHPTFALIRNT                  | ----- | TLSDKL  | --- | KLSLSDAGVT         | IVLKGSLDEG                  | ---SLAEAVSKV  | VDVVI : 79     |
| At4g39230  | : ASARSGHPTLVLVRNS                  | ----- | TLTSPS  | --- | RSSTIENFKNLGVQ     | IVLLGDLDDHT                 | ---SLVNSIKQV  | ADVVI : 81     |
| PLR_Forin  | : ASLAQGHETYILHRPE                  | ----- | IGVDID  | --- | KVEMLI SFKMQGAH    | IVSGSFKDFN                  | ---SLVEAVKLV  | VDVVI : 80     |
| PCBER_Fori | : ASAKSGHPTFALFRES                  | ----- | TISDPV  | --- | KGKIIEGFKNSGVT     | IVLTGDLYDHE                 | ---SLVKAIKQV  | VDVVI : 81     |
| IFR_Cicar  | : ASIKAGNPTYALIRKTPGDINKPSLVAAANPES | ----- | KEELLQ  | --- | SFKAAGVILLEGDMNDHE | ---ALVKAIKQV                | VDTVI : 92    |                |
| DFR_At5g42 | : RLLERGYFVRATVRD                   | ----- | PGNLK   | --- | KVQHLLDL PNAKTL    | IVTLWKADLSEEGSYDDAINGCDGV   | FHVA : 85     |                |
| At2g45400  | : RLLQRGYSVRATVRTN                  | ----- | SEGNKK  | --- | DISYLTEL PFASE     | IVQIF TADLNEPESFKPAIEGCKAV  | FHVA : 119    |                |
| DFR_Vitvi  | : RLLERRLTVRATVRD                   | ----- | PTNVK   | --- | KVKHLLDL PKAETH    | IVTLWKADLAEEGSFDEAIKIGCTGV  | FHVA : 85     |                |
| DFR_MAIZE  | : KLLQAGYTVRATVRD                   | ----- | PANVG   | --- | KTKPLMDLPGATER     | IVSIWKADLAEEGSFHDAIRGCTGV   | FHVA : 90     |                |
| At4g27250  | : SLLQRGYTVHATLRD                   | ----- | LAKSEY  | --- | FQSKWKENER         | IVLFRADLRDDGSFDDAVKGC       | CDGVFHVA : 87 |                |
| ANR_Medtr  | : QLLKGYAVNTTVRD                    | ----- | LDSANK  | --- | TSHLIALQSLGE       | IVLNLFKAELTIEEDFDAPISGCELV  | FQLA : 90     |                |
| ANR_Arath  | : HLLQSGYKVNTTVRD                   | ----- | PENEK   | --- | KIAHLRKLQELGD      | IVLKI FKADLTDEDSFESSFSGCEY  | IFHVA : 89    |                |
| ANR_Phaco  | : QLLHKGAVNTTVRD                    | ----- | PDNAK   | --- | KI SHLLALQSLGD     | IVLNI FGADLTGERDFDAPISGCELV | FQLA : 87     |                |
| ANR_Gosar  | : LLLKGFVAVNTTVRD                   | ----- | PDNQK   | --- | KI SHLVTLQELGD     | IVLKI FQADLTDEGSFDAPISGCELV | FHVA : 87     |                |
| ANR_Vitvi  | : LLLQGYAVNTTVRD                    | ----- | PDNQK   | --- | KVSHLLELQELGD      | IVLKI FRADLTDELSFEAPIAGCDFV | FHVA : 88     |                |

|            | 160                          | *     | 180      | *       | 200         | *           | 220                   |                     |                  |           |       |
|------------|------------------------------|-------|----------|---------|-------------|-------------|-----------------------|---------------------|------------------|-----------|-------|
| LAR Orysa  | : SVMG                       | ----- | GAST     | LDQLGL  | IEAIRAAG    | TVKRFLPS    | --EFGHD               | VDR--               | ARPVGAGLRFYEEK   | : 152     |       |
| LAR Desun  | : SLVG                       | ----- | GART     | LDQLTL  | IEAIKSVK    | TIKRFLPS    | --EFGHD               | VDR--               | TDPVEPGLTMYKEK   | : 142     |       |
| LAR1 Pinta | : STVG                       | ----- | GALT     | LDQLKI  | VDIAIKEVG   | TVKRFLPS    | --EFGHD               | VDR--               | ADPVEPALSFYIEK   | : 184     |       |
| LAR1 Vitvi | : STVG                       | ----- | GEST     | LDQIAL  | VKAMKAVG    | TIKRFLPS    | --EFGHD               | VNR--               | ADPVEPGLNMYREK   | : 140     |       |
| LAR2 Vitvi | : SAVG                       | ----- | GATL     | LDQLT   | AEAIKAVGS   | IKRFLPS     | --EFGHD               | IDR--               | AEPVEPGLTMYMEK   | : 151     |       |
| LAR1 Vitsh | : STVG                       | ----- | GEST     | LDQIAL  | VKAMKAVG    | TIKRFLPS    | --EFGHD               | VNR--               | ADPVEPGLNMYREK   | : 140     |       |
| LAR Horvu  | : SVMG                       | ----- | GANT     | LDQLGL  | IKAIQAAG    | TVKRFLPS    | --EFGHD               | VDR--               | ARPVGAGLGFYEEK   | : 147     |       |
| LAR Medtr  | : SAIG                       | ----- | AEST     | LDQLT   | LV EAMKSIK  | TIKRFLPS    | --EFGHD               | VDR--               | ADPVEPGLAMYKQK   | : 143     |       |
| LAR Phaco  | : SAIG                       | ----- | AKSL     | LDQLI   | LV EAMKSLK  | TIKRFLAS    | --KFGHD               | VDR--               | ADPVEPGLTMYKEK   | : 142     |       |
| LAR2 Gosar | : SAVG                       | ----- | GEST     | LDQLS   | LV EAIKNVNT | TVKRFLPS    | --EFGHD               | IDR--               | AEPVEPGLTMYEQK   | : 146     |       |
| LAR2 Gosra | : SAVG                       | ----- | GEST     | LDQFS   | LV EAIKNVNT | TVKRFLPS    | --EFGHD               | IDR--               | AEPVEPGLTMYEQK   | : 146     |       |
| LAR1 Gosar | : SAIG                       | ----- | GATL     | LDQLS   | LV EAIHSVG  | TVKRFLPS    | --EFGHD               | VDR--               | ADPVEPGLTMYKEK   | : 138     |       |
| LAR1 Gosra | : SAIG                       | ----- | GATL     | LDQLS   | LV EAIHSVG  | TVKRFLPS    | --EFGHD               | VDR--               | ADPVEPGLTMYKEK   | : 138     |       |
| IFRL1 Vitv | : CTMSGV                     | ----- | HFRSHN   | LDQLK   | LV EAIKEAGN | IKRFLPS     | --EFGMD               | PAR-                | MEDALEPGRVTFDEK  | : 138     |       |
| IFRL2 Vitv | : SALA                       | ----- | YPOV     | LDQLK   | IIDAIKVAG   | TKRFLPS     | --DFG                 | VEEDS-              | VTVLSPFQDFLDKK   | : 142     |       |
| IFRL3 Vitv | : STLA                       | ----- | VPOH     | LEQFK   | IIDAIKKAGN  | IK EGLSHR   | -SFG                  | NEVDR-              | VSGLPPFQALLENK   | : 136     |       |
| IFRL4 Vitv | : STVG                       | ----- | FMQI     | ADQVK   | IIAAIKEAGN  | VKRFLPS     | --EFGND               | VDR--               | VNAVEPAKSFAFAK   | : 133     |       |
| IFRL5 Vitv | : STVG                       | ----- | HAQI     | PDQVK   | IIAAIKEAGN  | VKRFFPS     | --EFGND               | VDR--               | VHAVEPAKTAFATK   | : 131     |       |
| IFRL6 Vitv | : STVG                       | ----- | RAQI     | SDQVK   | IIAAIKEAGN  | VKRFFPS     | --EFGND               | VDR--               | VHAVGPAKTAFAEIK  | : 133     |       |
| At1g19540  | : SAVGRF                     | ----- | QTEI     | LNQTN   | IIDAIKESGN  | VKRFLPS     | --EFGND               | VDR--               | TVAIEPTLSEFITK   | : 133     |       |
| At1g32100  | : SAMSGV                     | ----- | HFRSHN   | LDQLK   | LV EAIKEAGN | VKRFLPS     | --EFGMD               | PPR-                | MGHALPPGRETDFDQK | : 144     |       |
| At1g75280  | : STVG                       | ----- | SMQI     | LDQTK   | II SAIKEAGN | VKRFLPS     | --EFGVD               | VDR--               | TSAVEPAKSAFAGK   | : 134     |       |
| At1g75290  | : STVG                       | ----- | SMQI     | LDQTK   | II SAIKEAGN | VKRFLPS     | --EFGMD               | VDK--               | SSAVEPAKSAFGRK   | : 134     |       |
| At1g75300  | : STIG                       | ----- | HKQI     | FDQTK   | II SAIKEAGN | VKRFLPA     | --EFGID               | VER--               | TSAVEPAKSLFAGK   | : 134     |       |
| At4g13660  | : SAMSGV                     | ----- | HFRTHN   | IPVQLK  | LVAAIKEAGN  | VKRFLPS     | --EFGMD               | PSR-                | MGHAMPPGSETFDQK  | : 144     |       |
| At4g34540  | : SAIP                       | ----- | SKHV     | LDQKL   | LV RVIKQAGS | IKRFLPA     | --EYGAN               | PDK--               | TQVSDLDHDFYSKK   | : 131     |       |
| At4g39230  | : STVG                       | ----- | HSLI     | GHQYK   | II SAIKEAGN | VKRFFPS     | --EFGND               | VDR--               | VFTVEPAKSAYATK   | : 133     |       |
| PLR Forin  | : SAISGV                     | ----- | HIRSHQ   | LLQLK   | LV EAIKEAGN | VKRFLPS     | --EFGMD               | PAKFMDTAMEPGKVTLDEK | : 139            |           |       |
| PCBER Fori | : STVG                       | ----- | SLQI     | ADQVK   | IIAAIKEAGN  | VKRFFPS     | --EFGTD               | VDR--               | CHAVEPAKSSYEIK   | : 133     |       |
| IFR Cicar  | : CTFG                       | ----- | RLLI     | LDQVK   | II KAIKEAGN | VKRFFPS     | --EFGLD               | VDR--               | HDAVDPVRPVFDEK   | : 144     |       |
| DFR At5g42 | : TPMDFESKDP                 | ----- | ENEVIKPT | VNGMLG  | IMKACVKAK   | TVRRVFV     | ISSAGT                | VNVEEHQKN           | ---              | VYDENDWSD | : 149 |
| At2g45400  | : HPMDPNSNET                 | ----- | EETVTKRT | VQGLMGI | LKSCLD      | AKTVKRFFY   | ISSAVT                | VFYSGNGGGGGEVDES    | VVWSD            | : 186     |       |
| DFR Vitvi  | : TPMDFESKDP                 | ----- | ENEVIKPT | VEGMLG  | IMKSCAAAK   | TVRRVLF     | ISSAGT                | VNIQEHLQP           | ---              | VYDESCWSD | : 149 |
| DFR MAIZE  | : TPMDFLSKDP                 | ----- | ENEVIKPT | VEGMIS  | IMRACKEAG   | TVRRIVF     | ISSAGT                | VNLEERQRP           | ---              | VYDEESWTD | : 154 |
| At4g27250  | : ASMEFDISSDHVNLESYVQSKVIEPA | ----- | LKGVNR   | LVSSCLK | SKSVKRVVF   | ISSIST      | LTAKDENERMRSFVDETCKAH | : 162               |                  |           |       |
| ANR Medtr  | : TPVNFASQDP                 | ----- | ENDMIKPA | IKGVLN  | VLKACVR     | AKVVRVIL    | ISSAAAVT              | INELEGTG            | -HVMDET          | NWSD      | : 156 |
| ANR Arath  | : TPVNFKSEDP                 | ----- | EKDMIKPA | IQGVIN  | VLKSCLS     | KS SVKRVVIY | ISSAAAVS              | INNLSGTG            | -IVMNEEN         | NWTD      | : 155 |
| ANR Phaco  | : TPVNFASEDP                 | ----- | ENDMIKPA | ISGVLN  | VLKACAR     | VKGVKRVIL   | ISSAAAVT              | INPVKDTG            | -LVMDES          | NWTD      | : 153 |
| ANR Gosar  | : TPVNFASEDP                 | ----- | ENDMIKPA | TQGVVN  | VLKACAK     | AKTVKRVVIL  | ISSAAAVS              | INTLDGTD            | -LVMTEK          | DWTD      | : 153 |
| ANR Vitvi  | : TPVNFASEDP                 | ----- | ENDMIKPA | TQGVVN  | VLMKACT     | RKSVKRVIL   | ISSAAAVT              | INQLDGTG            | -LVVDEK          | NWTD      | : 154 |

|            | * | 240              | *     | 260     | *         | 280     | *             | 300      |                 |               |              |
|------------|---|------------------|-------|---------|-----------|---------|---------------|----------|-----------------|---------------|--------------|
| LAR Orysa  | : | RLVRRAAEASGVPYTF | ICCN  | SIAGWPY | HDSTHP    | -----   | SELPPPLDRFQ   | IYGDGDVR | ----AF : 206    |               |              |
| LAR Desun  | : | RLVRRAVEEYGIPTN  | ICCN  | SIASWPY | YDNCHP    | -----   | SQVPPPMQDQFQ  | IYGDGNTK | ----AY : 196    |               |              |
| LAR1 Pinta | : | RKVRRAVEEAKIPYTY | ICCN  | SIAGWPY | YYHTHP    | -----   | TELPKPKEQFET  | IYDGDSVK | ----AF : 238    |               |              |
| LAR1 Vitvi | : | RRVRQLVEESGIPFTY | ICCN  | SIASWPY | YNNIHP    | -----   | SEVLPPPTDFFQ  | IYDGNVK  | ----AY : 194    |               |              |
| LAR2 Vitvi | : | RKVRRFIEEAAIPYTY | ICCN  | SIAAWPY | HDNTHP    | -----   | ADVLPPPLDRFHI | IYDGDSVK | ----AY : 205    |               |              |
| LAR1 Vitsh | : | RRVRQLVEESGIPFTY | ICCN  | SIASWPY | YNNIHP    | -----   | SEVLPPPTDFFQ  | IYDGNVK  | ----AY : 194    |               |              |
| LAR Horvu  | : | RRVRRAAEAAGVPYTY | ICCN  | SIAGWPY | FDNMHP    | -----   | SEVRPPLDRFQ   | IYDGTVR  | ----AF : 201    |               |              |
| LAR Medtr  | : | RLVRRVIEESGVPYTY | ICCN  | SIASWPY | YDNCHP    | -----   | SQLPPPLDQLHI  | IYHGNNVK | ----AY : 197    |               |              |
| LAR Phaco  | : | QLVRRVVEQSGVPYTN | ICCN  | SIASWPY | YDNCHP    | -----   | SQLPPPLDQLO   | IYHGNNVK | ----AY : 196    |               |              |
| LAR2 Gosar | : | RKIRRQIEECGIPYSY | ICCN  | SIAAWPY | HDNTHP    | -----   | ADVLPPPLDRFQ  | IYDGTVK  | ----AY : 200    |               |              |
| LAR2 Gosra | : | SKIRRQIEECGIPYSY | ICCT  | PIAAWPY | HDNTHP    | -----   | ADVLPPPLDRFQ  | IYDGTVK  | ----AY : 200    |               |              |
| LAR1 Gosar | : | RQVRRLIEKLEIPYTY | ICCN  | SIASWPY | HNNTHP    | -----   | SEVIPPLDHFEI  | IYDGDSVK | ----AY : 192    |               |              |
| LAR1 Gosra | : | RQVRRLIEKLEIPYTY | ICCN  | SIASWPY | HNNRHP    | -----   | SEVIPPLDHFEI  | IYDGDSVK | ----AY : 192    |               |              |
| IFRL1 Vitv | : | MVVRKAIEEANIPHTY | VSSN  | CFAA    | YFVNLSQ   | LGTLT   | -----         | PPKEKVF  | IYDGNVK         | ----AV : 192  |              |
| IFRL2 Vitv | : | RIIRRAIEAAGISYTF | VSAN  | CLGAY   | FVNYLLHP  | -----   | HDHSN--DSITV  | YGSAAEQ  | ----AV : 194    |               |              |
| IFRL3 Vitv | : | KKVRRATEAAGIPFTY | VSAN  | SFAA    | YFVDYLLHP | -----   | HERT---QHVS   | IYNGDAK  | ----AV : 187    |               |              |
| IFRL4 Vitv | : | VQMRRAIEAEGIPYTF | VVANC | FAGY    | FLPTLVQ   | --PGVSA | -----         | PPRDKVI  | ILGDGNPK        | ----AC : 187  |              |
| IFRL5 Vitv | : | AQIRRTIEAEGIPYTY | VSSN  | FFAGY   | FLPLSLQ   | --PGATT | -----         | PPRDKVI  | ILGDGNPK        | ----AV : 185  |              |
| IFRL6 Vitv | : | AQIRRTIEAEGIPYTY | VSSN  | FFAGF   | FLPTLSQ   | --PGATA | -----         | PPRDKVI  | ILGDGNPK        | ----AV : 187  |              |
| At1g19540  | : | AQIRRAIEAAKIPYTY | VVSG  | CFAGL   | FVPCLGQC  | HLRLRS  | -----         | PPRDKVS  | IYDTGNGK        | ----AI : 189  |              |
| At1g32100  | : | MEVRRKIEAAGIPYTY | VVGC  | FAA     | YFVNLSQ   | MVTL    | -----         | PPKEKVN  | IYDGNVK         | ----VV : 198  |              |
| At1g75280  | : | IQIRRTIEAEGIPYTY | AVTGC | FGGY    | YLLPTLVQ  | FEPGLTS | -----         | PPRDKVT  | ILGDGNAK        | -EYFAAV : 194 |              |
| At1g75290  | : | LQTRRDIEAEGIPYTY | LVTNY | FAGY    | YLLPTLVQ  | LEPGLTS | -----         | PPRDKVK  | IFGDGNVKVEYFIAV | : 195         |              |
| At1g75300  | : | VQIRRAIEAEGIPYTY | VVSN  | CSAG    | FYLRTLLQ  | FESGLIS | TRDKAI        | IFGDKNVP | PPRDKVT         | ILGDGNAK      | ----VV : 204 |
| At4g13660  | : | MEIRNAIKAAGISHTY | LVGAC | FAA     | YFGGNLSQ  | MGTFL   | -----         | PPKNKVD  | IYDGNVK         | ----VV : 198  |              |
| At4g34540  | : | SEIRHMIESEGIPYTY | ICCG  | LFMRV   | LLPSLVQP  | -----   | GLQSPPTDKVT   | VFGDGNVK | ----AV : 185    |               |              |
| At4g39230  | : | AKIRRTIEAEGIPYTY | VSCN  | FFAGY   | FLPTLAQ   | --PGATS | -----         | APRDKVI  | VLGDGNPK        | ----AV : 187  |              |
| PLR Forin  | : | MVVRKAIEKAGIPFTY | VSAN  | CFAGY   | FLGGLCQ   | FGKIL   | -----         | PSRDFVI  | IYDGNKK         | ----AI : 193  |              |
| PCBER Fori | : | SKIRRAVEAEGIPFTY | VSSN  | FFAGY   | SLPTLVQ   | --PGVTA | -----         | PPRDKVI  | ILGDGNAK        | ----AV : 187  |              |
| IFR Cicar  | : | ASIRRVVEAEGVPYTY | LCC   | HAFTG   | YFLRNLAQ  | --FDATE | -----         | PPRDKVI  | ILGDGNVK        | ----GA : 198  |              |
| DFR At5g42 | : | LEFIM--SKKMTG    | WMY   | FVSKTLA | EKAAWDF   | FAEE    | -----         | KGLDFIS  | IPTLVVG         | -PFITTS : 201 |              |
| At2g45400  | : | VEVFRNQKEKRVSSSY | VVSK  | MAAETA  | ALEFGGK   | -----   | NGLEVVT       | VIPLVVG  | -PFISSS : 240   |               |              |
| DFR Vitvi  | : | MEFCR--AKKMTA    | WMY   | FVSKTLA | EQAAWKY   | AKE     | -----         | NNIDFIT  | IPTLVVG         | -PFIMSS : 201 |              |
| DFR MAIZE  | : | VDFCR--RVKMTG    | WMY   | FVSKTLA | EKAALAY   | AAE     | -----         | HGLDLVT  | IPTLVVG         | -PFISAS : 206 |              |
| At4g27250  | : | VDHVL--KTQASG    | WIY   | VLSKLV  | SEEEAF    | RYAKE   | -----         | RGMDLVS  | VITTTVSG        | -PFLTPF : 214 |              |
| ANR Medtr  | : | VEFLN--TAKPPT    | WGY   | PVSKVLA | EKAAWK    | FAEE    | -----         | NNIDLIT  | VIPALTIG        | -PSLTQD : 208 |              |
| ANR Arath  | : | VEFLT--EEKPFN    | WGY   | PISKVLA | EKTAW     | EFAKE   | -----         | NKINLVT  | VIPALIAG        | -NSLLSD : 207 |              |
| ANR Phaco  | : | VEFLN--TAKPPT    | WGY   | PVSKALA | EKAAWK    | FAEE    | -----         | NHIDLIT  | VIPALTTG        | -PSLTPD : 205 |              |
| ANR Gosar  | : | IEFLS--SAKPPT    | WGY   | PASKTLA | EKAAWK    | FAEE    | -----         | NNIDLIT  | VIPSLMTG        | -PSLTPI : 205 |              |
| ANR Vitvi  | : | IEFLT--SAKPPT    | WGY   | PASKTLA | EKAAWK    | FAEE    | -----         | NNIDLIT  | VIPMLAG         | -SSLTSD : 206 |              |

|            | * | 320         | *     | 340        | *                                                         | 360                                  | *   |                          |
|------------|---|-------------|-------|------------|-----------------------------------------------------------|--------------------------------------|-----|--------------------------|
| LAR Orysa  | : | FVAGSDIGKFT | IRAA  | YDARSIN    | -KIVHFRPACNLLSTNEMASLWESKIGRTL                            | --RVT                                | LT  | TEEDLIAMAADDI IPE : 278  |
| LAR Desun  | : | FIDGNDIGKFT | MKTID | DIRTLN     | -KNVHFRPSSNCYSINELASLWEKKIGRTL                            | --RFT                                | VT  | TADKLLAHAANI IPE : 268   |
| LAR1 Pinta | : | FVTGDDIGAYT | MKAV  | DDPRTL     | N-KSIHFRPPKNFLNLNELADIWENKINRTL                           | --RVS                                | VSA | EEDLVMIAKANFMPS : 310    |
| LAR1 Vitvi | : | FVAGTDIGKFT | MKTVD | DDVRTLN    | -KSVHFRPSCNCLNINELASVWEKKIGRTL                            | --RVT                                | VT  | TEEDLLAAAGENI I PQ : 266 |
| LAR2 Vitvi | : | FVAGTDIGKFT | IKTIN | DDRTVN     | -KSLHFRPPSNLVSINELASLWEKKIGRTL                            | --RVT                                | VE  | EDDLLAAAAEMCIPD : 277    |
| LAR1 Vitsh | : | FVAGTDIGKFT | MKTVD | DDVRTLN    | -KSVHFRPSCNCLNINELASVWEKKIGRTL                            | --RVT                                | VT  | TEEDLLAAAGENI I PQ : 266 |
| LAR Horvu  | : | FVAGTDIGKFT | VKAAY | DARSVN     | -KAVHFRPACNLLSTNEMACLWESKIGRTL                            | --RVT                                | LS  | KEELLAMAAEDI IPE : 273   |
| LAR Medtr  | : | FVDGYDIGKFT | MKVVD | DERTIN     | -KSVHFRPSTNCYSMNELASLWENKIARKIP                           | --RAI                                | VSE | DDLLGIAAENCIPE : 269     |
| LAR Phaco  | : | FVDGIDIGKFT | MKVID | DVKTIN     | -KNVHFRPSKNCYSINELASLGEMKIGRTIP                           | --RVT                                | ISE | DDLLAAAAENCIPE : 268     |
| LAR2 Gosar | : | FVAGSDIGKFT | VMSID | DDRTL      | N-KTVHFQPPSNLLNMNEMASLWETKIGRVL                           | --RVT                                | ITE | QDLLQRAQEMRI PQ : 272    |
| LAR2 Gosra | : | FVAGSDIGKFT | VMSID | DDRTL      | N-KTVHFQPPSNLLNMNEMASLWETKIGRVL                           | --RVN                                | ITE | QDLLQRAQEMRI PQ : 272    |
| LAR1 Gosar | : | FVAGTDIGKFT | MKTVD | DIRTLN     | -KSVHFRPACNFYMNELAALWERKIRRTL                             | --RVT                                | VT  | TEEDLLSAAAENI I PQ : 264 |
| LAR1 Gosra | : | FVAGTDIGKFT | MKTVD | DIRTLN     | -KSVHFRPACNFYMNELAALWERKIRRTL                             | --RVT                                | VT  | TEEDLLSAAAENI I PQ : 264 |
| IFRL1 Vitv | : | FVDEDDVAAYT | IKAI  | DDPRTL     | N-KTVYVRPPNLSQRQIIEMWEKLTGKLE                             | --KSS                                | IS  | AEEFLVSMKGLDYAG : 264    |
| IFRL2 Vitv | : | LNYEEDI     | ALYT  | IKVAN      | DPTACX-SDSHFSAPKNIISQLELIALWEKKTGRSFK                     | --RVH                                | V   | SKEELVKLSETLPNPQ : 266   |
| IFRL3 Vitv | : | LNFEEDVAAYT | IRAS  | VDPKSNANR  | VIYRPPGNIVSQDLIFFWEKKTGTKLQ                               | --RTH                                | IP  | EQDIIELFESLPFPE : 260    |
| IFRL4 Vitv | : | FNREDDIGTYT | IKAV  | DDPRTL     | N-KILYIKPPNSTLSFNELVSLWESKIGKTL                           | --KVY                                | V   | PEEQVLKDIQEAMPPI : 259   |
| IFRL5 Vitv | : | FNKEDDIGTYT | IKAV  | NDPRTL     | N-KILYIRPPQNTYSFNDELVSLWEKKIGKTL                          | --KIY                                | V   | PEEQVLKNIQEASVPL : 257   |
| IFRL6 Vitv | : | FNKEDDIGTYT | IKAA  | DDPRAL     | N-KILYIRPPQNTYSFNEIVSLWEKKIGKTL                           | --KIY                                | V   | PEEQVLKNIQEASFPL : 259   |
| At1g19540  | : | VNTEEDI     | IVAYT | LKAV       | DDPRTL N-KILYIHPPNYIVSQNDMVLWEKIGKTL                      | --KTY                                | V   | SEEELLKTIQESKPPM : 261   |
| At1g32100  | : | FADEDDIAKYT | AKT   | LNDPRTL    | N-KTVNIRPPDNVLTQLELVQIWEKLTGKLE                           | --KTN                                | IA  | AQDFLANIEQMEIPH : 270    |
| At1g75280  | : | INKEEDI     | AAYT  | IKAV       | DDPRTL N-KILYIKPSNNTLSMNEIVTLWEKKIGKSLE                   | --KTH                                | L   | PEEQLLKSIQESPIPI : 266   |
| At1g75290  | : | INKEEDI     | AAYT  | IKAV       | DDPRTL N-KTLYINPPNNTLSMNEIVTLWEKKIGKSVE                   | --KIY                                | M   | SEEQIFKSIQESVVPF : 267   |
| At1g75300  | : | INKEEDVAAYM | IKAV  | DDLRTL     | N-KTLYISPPNNILSMNEMVTLWEKKIGKSLE                          | --KTH                                | IS  | EEQILKSIQ---VPI : 273    |
| At4g13660  | : | FVDEDDMAKYT | AKT   | LNDPRTL    | N-KTVYVRPTDNILTQMEIVQIWEKLTGKLE                           | --KTY                                | V   | SGNDFLADIEDKEISH : 270   |
| At4g34540  | : | FVNDVDVAaft | IKTID | DPRTL      | N-KTLYLSPPGNICSMNDLVELWEGKIEKKLE                          | --KTF                                | F   | ATENQLLKKIKETPYPD : 257  |
| At4g39230  | : | FNKEEDI     | IGTYT | INAV       | DDPRTL N-KILYIRPPMNTYSFNDELVSLWENKIGKTL                   | --RIY                                | V   | PEEQLLKQIIESSPPL : 259   |
| PLR Forin  | : | YNNEDDI     | IATYA | IKTIN      | DPRTL N-KTIYISPPKNILSQREVQWTKLIGKELQ                      | --KIT                                | L   | SKEDFLASVKELEYAQ : 265   |
| PCBER Fori | : | FNEEHDIGTYT | IKAV  | DDPRTL     | N-KILYIKPPKNIYSFNELVALWENKIGKTL                           | --KIY                                | V   | QEEQLIKQIEESPFPI : 259   |
| IFR Cicar  | : | YVTEADIGTYT | IRA   | ANDPRTL    | N-KAVHIRLPHNYLTSNEVSLWEKKIGKTL                            | --KSY                                | I   | SEEKVLKDINVSTFPH : 270   |
| DFR At5g42 | : | MPPSLITALSP | ITRNE | AHYSIIR    | -----QGQYVHLDDL                                           | CNAHIFLYEQAAAKGRYICSSHDATILTISKFLRP  | :   | 269                      |
| At2g45400  | : | LPSSVFI     | ISLAM | IFGNY      | KEKYLFD-----TYNMVHIDDVARAMIFLLEKPVAKGRYICSSVEMKIDEVFEFLST | :                                    | 308 |                          |
| DFR Vitvi  | : | MPPSLITALSP | ITGNE | AHYSIIR    | -----QGQFVHLDDL                                           | CNAHIYLFENPKAEGRYICSSHDCIILDALAKMLRE | :   | 269                      |
| DFR MAIZE  | : | MPPSLITALAL | ITGN  | APHYSILK   | -----QVQLIHLDDL                                           | CDAEILFENPAAAGRYVCCSHDVTIHGLAAMLRD   | :   | 274                      |
| At4g27250  | : | VPSSVQVLLSP | ITGDS | KLFAILSAVN | KRMGSIALVHIEDICRAHLFLMEQPKAKGOYICCVDNIDMHELMLHHS          | :                                    | 289 |                          |
| ANR Medtr  | : | IPSSVAMGMSL | ITGND | FLINALKGM  | QFLSGSISITHVEDICRAHIFVAEKESTSGRYICCAHNTSVPELAKFLSK        | :                                    | 283 |                          |
| ANR Arath  | : | PPSSLSLSMSF | ITGK  | EMHVTGLKEM | QKLSGSISFVHVDDLARAHLFLAEKETASGRYICCAYNNTSVPEIADFLIQ       | :                                    | 282 |                          |
| ANR Phaco  | : | IPSSVGLATSL | ITGND | FLINALKGM  | QFLSGSISITHVEDICRAHIYVAENESSSGRYIVSAHNTSVPELAKFLSK        | :                                    | 280 |                          |
| ANR Gosar  | : | VPSSIGLATSL | ISGNE | FLINALKGM  | QMLSGSISITHVEDVCRAHVFLAEKESASGRYICSAVNTSVPELAKFLNK        | :                                    | 280 |                          |
| ANR Vitvi  | : | VPSSIGLAMSL | ITGNE | FLINGMKGM  | QMLSGSVSIAHVEDVCOAHIFVAEKESASGRYICCAANTSVPELAKFLSK        | :                                    | 281 |                          |

```

      380          *          400          *          420          *          440          *
LAR Orysa   : SIVASLTHDIFINGCQTHFYIDGPRDIEISSLYPDIPTFRTIDECFDDYIHVLNLAEEAKEEE----- : 340
LAR_Desun   : SIVSSFTHDIFINGCQVNFSDIDEHSDVEIDTLYPDEKFRSLDDCYEDFVPMVHDKIHAGKSGEI KIKDGKPLVQT : 343
LAR1_Pinta  : SIVAALTHDIFINGCQFKFP IQEPHHVEACELYPDIKYTTMEDFFQGYL----- : 359
LAR1_Vitvi  : SVVAAFTHDIFIKGCQVNFSDIGPEDVEVTTLYPEDSFRTVEECFGEYIVKMEE---KQPTADSAIAN----- : 331
LAR2_Vitvi  : SIVASFTHDIFIKGCQVNFSLDKPTDLEATSLYPEMQFRTIDECFDEFVEKIMGQAAAEK-----EG----- : 340
LAR1_Vitsh  : SVVAAFTHDIFIKGCQVNFSDIGPEDVEVTTLYPEDSFRTVEECFGEYIVKIEE---KQPTADSAIAN----- : 331
LAR_Horvu   : SIVASLTHDIFINGCQTNFGIDGSRDIEISSLYPDIPTFRTIDECFDDYARGLHLEEEAEESK----- : 335
LAR_Medtr   : SVVASITHDIFINGCQVNFKIDGIHDVEISTLYPGESFRSLEDCEFESFVAMAADKIHKGENG----- : 331
LAR_Phaco   : SIVASFTHDIFIKGCQVNFSDIGVDDVEITTLYPDEEFRSLED CYEDFAHMIEDNIHKGEHK----- : 330
LAR2_Gosar  : SVVAATHDIFINGCQINFSLDKTTDVEICSLYPNTSFRTIAECFDDFAKKISDNEKAVSKPVTASNTD----- : 341
LAR2_Gosra  : SVVAATHDIFINGCQINFSLDKTTDVEVCSLYPNTSFRTIAECFDDFAKKISDNEKAVSKPVTASNTD----- : 341
LAR1_Gosar  : SVVASFTHDIFIKGCQINFPIEGPNETEACSLYPNEPFRTLDDCFNDFLAKMKDENMKQSDENTKQSNE----- : 333
LAR1_Gosra  : SVVASFTHDIFIKGCQINFPIEGPNETEACSLYPNEPFRTLDDCFNDFVAKMKDENMKQSDENTKQSNE----- : 333
IFRL1_Vitv : QVGVGHFYHIYYEGCLTNFIEGEG--EEASSLYPDVKYKRMDDYL RMFL----- : 312
IFRL2_Vitv : NIPVAILHSIFIKGVVMNFEIGE--DDIEVSKLYPDINYSID----- : 307
IFRL3_Vitv : NIPVAILHNI FIKGDQVSFELPA--NDLEASELYPDYKYTSVDKLLDLCLVNPAPKPKRAAFA----- : 320
IFRL4_Vitv : NVFLSIQHSHVFNVDQTNFIEI E P SFGVEASELYPDVKYCTVDEYLSAFV----- : 308
IFRL5_Vitv : NVILSISHSVFIKGDHTNFEI E P SFGVEATELYPDVKYTTVDEYLNQFV----- : 306
IFRL6_Vitv : NVILSISHSVFIKGDHTNFEI E P SFGVEASELYPDVKYTTVDEYLDQFV----- : 308
At1g19540  : DFLVGLIHTILVKSDFTSFTIDPSFGVEASELYPEVKYTSVDEFLNRFI----- : 310
At1g32100  : QAGIGHFYHIYYEGCLTNFIEGEG--EEASSLYPDVKYKRMDDYL RMFL----- : 317
At1g75280  : NVVLSINHAVFVNGD--TNISIEP SFGVEASELYPDVKYTSVDEYLSYFA----- : 314
At1g75290  : NVLLSINHAVFVKGDQTNFTIEP SFGFEASELYPDIKYTSIDEYLSYFALGTSLNT----- : 323
At1g75300  : DVFKSINHAVFVKGDQTSFTIEPWFGEASVLYPDVKYTSIDEYLSQFT----- : 322
At4g13660  : QAGLGHFYHIYYEGCLTNFIEGEG--EEATKLYPDVKYKRMDEYLKIFV----- : 317
At4g34540  : NMEMVFIYSVFIKGDHTYFDIESCGGVNGTELYPDVKYMTVSEFLD TLL----- : 306
At4g39230  : NVMLSLCHCVFVKGGHTSFEI E P SFGVEASELYPDVKYTTVDEILNQYV----- : 308
PLR_Forin  : QVGLSHYHDVNYQGCLTSFEIGDE--EEASKLYPEVKYTSVEEY LKRYV----- : 312
PCBER_Fori : NIVLAINHSVFKGDLTNFKIEP SFGVEASELYPDVKYTTVVEEYLSHFV----- : 308
IFR_Cicar  : NYLLALYHSQIKGD--AVYEIDPAKDAEAYDLYPDVKYTTADEYLDQFV----- : 318
DFR_At5g42 : KYPEYNVPSTFEGVDE--NLKSIEFSSKLLTDMGFNFKYS--LEEMFIESIETCRQKGF LPVSLSYQSISEIKTKNE : 342
At2g45400  : KFPQFQLPSIDLNKYK--VEKRMGLSSKLLKSAGFEFKYG--AEEIFSGAIRSCQARGFL----- : 364
DFR_Vitvi  : KYPEYNIPTEFKGVDE--NLKSVCFSSKLLTDLGF EFKYS--LEDMFTGAVDTCRAKGLLRP-----SHEK : 331
DFR_MAIZE  : RYPEYDVPQRFPGIQD--DLQPVRFSSKLLQDLGFTFRYKTL EDMFDAAIRTCQEKGLIPL-----ATAA : 337
At4g27250  : KDYLCKVQVNEDEEERECMKPISSKLLRELGF EFKYG--IEEIVDQ TIDASIKIKFPTLNHKL RQ----- : 354
ANR_Medtr  : RYPQYKVPTEFDDFPS--KAK--LIISGKLIKEGFSFKHS--IAETF DQTV EY LK TQG--IK----- : 338
ANR_Arath  : RYPKYNVLSEFEEGLS--IPK--LTLSSQKLINEGFRFEYG--INEMYDQMI EYFESKGLIKAK----- : 340
ANR_Phaco  : RYPQYKVPTEFDDCPS--KAK--LTISS EKL VKEGFSFKYG--IEE IYDQTV EY LKNKGT LKN----- : 337
ANR_Gosar  : RYPDFKVPTDFGDFPS--KPK--LIISSEKLISEGFSFKYG--IEE IYDQTV EY LKSKGL LK----- : 336
ANR_Vitvi  : RYPQYKVP TDFGDFPP--KSK--LIISSEKLVKEGFSFKYG--IEE IYDESVEYF KAKGL LQN----- : 338

```



\*

|            |             |   |     |
|------------|-------------|---|-----|
| LAR Orysa  | : -----     | : | -   |
| LAR_Desun  | : -----     | : | -   |
| LAR1_Pinta | : -----     | : | -   |
| LAR1_Vitvi | : -----     | : | -   |
| LAR2_Vitvi | : -----     | : | -   |
| LAR1_Vitsh | : -----     | : | -   |
| LAR_Horvu  | : -----     | : | -   |
| LAR_Medtr  | : -----     | : | -   |
| LAR_Phaco  | : -----     | : | -   |
| LAR2_Gosar | : -----     | : | -   |
| LAR2_Gosra | : -----     | : | -   |
| LAR1_Gosar | : LILWEGNWI | : | 395 |
| LAR1_Gosra | : -----     | : | -   |
| IFRL1_Vitv | : -----     | : | -   |
| IFRL2_Vitv | : -----     | : | -   |
| IFRL3_Vitv | : -----     | : | -   |
| IFRL4_Vitv | : -----     | : | -   |
| IFRL5_Vitv | : -----     | : | -   |
| IFRL6_Vitv | : -----     | : | -   |
| At1g19540  | : -----     | : | -   |
| At1g32100  | : -----     | : | -   |
| At1g75280  | : -----     | : | -   |
| At1g75290  | : -----     | : | -   |
| At1g75300  | : -----     | : | -   |
| At4g13660  | : -----     | : | -   |
| At4g34540  | : -----     | : | -   |
| At4g39230  | : -----     | : | -   |
| PLR_Forin  | : -----     | : | -   |
| PCBER_Fori | : -----     | : | -   |
| IFR_Cicar  | : -----     | : | -   |
| DFR_At5g42 | : -----     | : | -   |
| At2g45400  | : -----     | : | -   |
| DFR_Vitvi  | : -----     | : | -   |
| DFR_MAIZE  | : -----     | : | -   |
| At4g27250  | : -----     | : | -   |
| ANR_Medtr  | : -----     | : | -   |
| ANR_Arath  | : -----     | : | -   |
| ANR_Phaco  | : -----     | : | -   |
| ANR_Gosar  | : -----     | : | -   |
| ANR_Vitvi  | : -----     | : | -   |
