# Supplementary material
Source: PubMed Central journal article supplement (PMC1255985)
Supplement: plntphys_pp.105.064238_3.pdf [file plntphys_pp.105.064238_3.pdf]

**Supplementary Figure 3:** Comparison of northern blot and real-time PCR data for *VvANR* expression in A) skin and B) seed during grape berry development. Expression determined by real-time PCR is shown relative to expression of *VvUbiquitin1* in each sample. All data is presented as the mean of three replicates. Real-time PCR was performed as described in Materials and Methods. For northern blot analysis 2 µg of total RNA were denatured and resolved on a 1% (w/v) agarose gel containing 1X MOPS (pH 7.5) and 5% (v/v) formaldehyde. The RNA was blotted by salt transfer to Nytran®SuPerCharge membrane using a TurboBlotter™ system (Schleicher and Schuell, Germany). A gene probe for *VvANR* was labelled with [<sup>32</sup>P]-dCTP using a Rediprime™ II Random Prime Labelling System following the manufacturer's protocol (Amersham). Hybridization was at 65°C in ULTRAhyb™ solution (Ambion, Austin Tx, USA). Washing was at 65°C for 15 min in 0.1X SSC containing 0.1% (w/v) SDS and was repeated twice.

**A****VvANR expression in skin**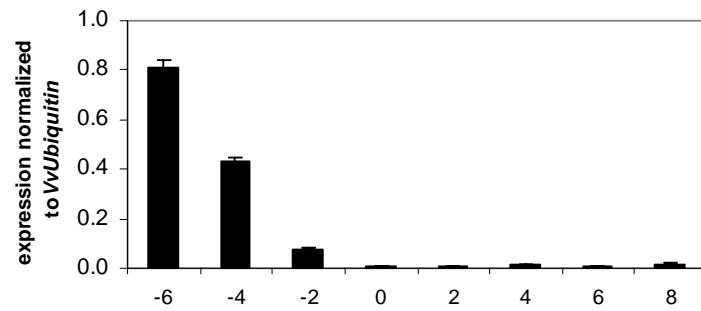

RNA blot

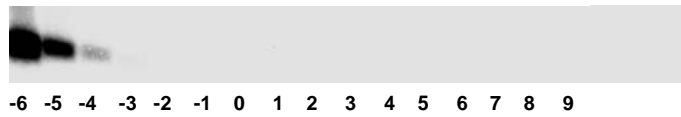

Weeks from onset of ripening

**B****VvANR expression in seeds**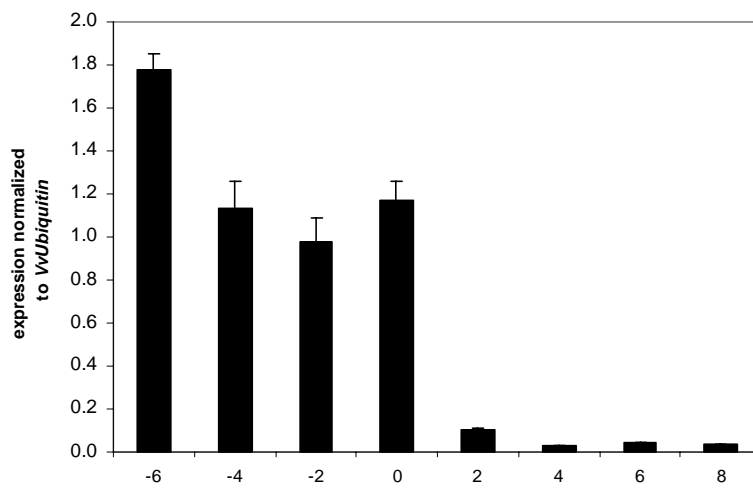

RNA blot

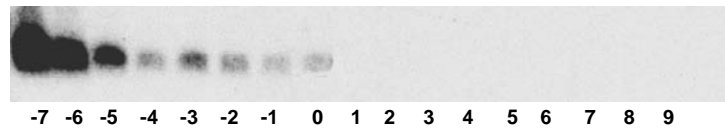

Weeks from onset of ripening
